# Supplementary material for: Molecular insight into cellulose regeneration from a cellulose/ionic liquid mixture: effects of water concentration and temperature
Source: Royal Society of Chemistry journal article supplement (doi:10.1039/c3ra22561e), 2013-01-01
Supplement: c3ra22561e.pdf [file c3ra22561e.pdf]

## Electronic Supplementary Information

### Molecular insight into cellulose regeneration from cellulose/ionic liquid mixture: effects of water concentration and temperature

Krishna M. Gupta, Zhongqiao Hu and Jianwen Jiang\*

*Department of Chemical and Biomolecular Engineering, National University of Singapore, 117576, Singapore*

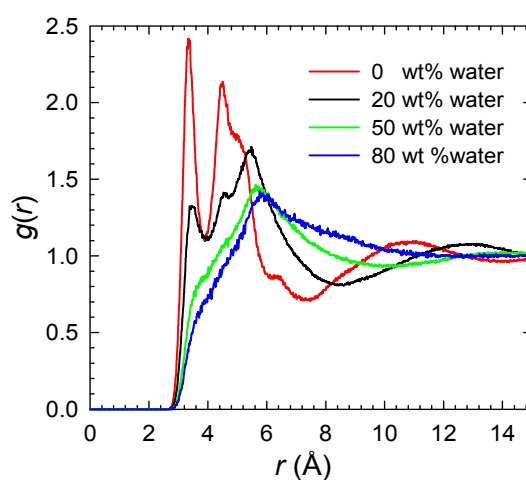

**Fig. S1** Radial distribution functions for  $C_2$  atom of  $[BMIM]^+$  around  $O_A$  and  $O_B$  atoms of  $[Ac]^-$  in cellulose/ $[BMIM][Ac]$ /water mixtures at 0, 20, 50, and 80 wt% water.

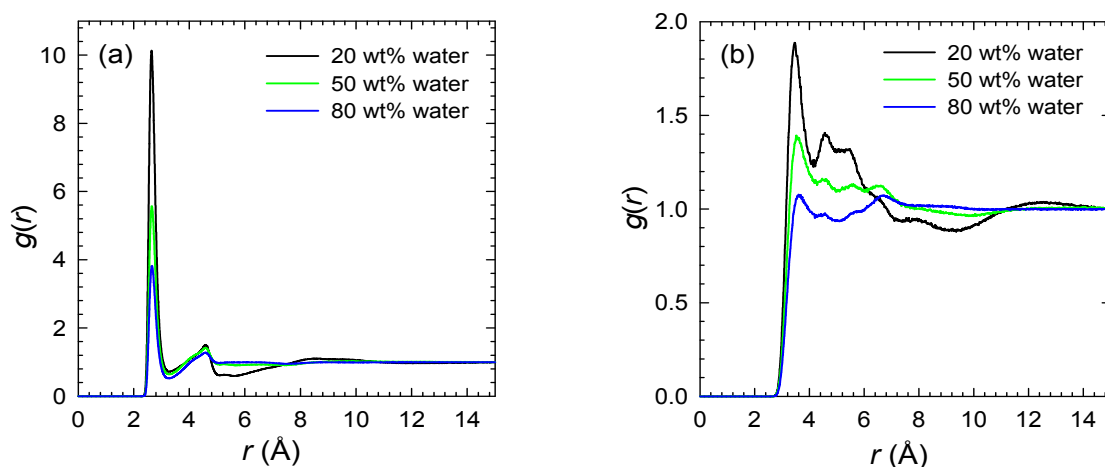

**Fig. S2** Radial distribution functions for  $O_w$  atom of water around (a)  $O_A$  and  $O_B$  atoms of  $[Ac]^-$  (b)  $C_2$  atom of  $[BMIM]^+$  in cellulose/ $[BMIM][Ac]$ /water mixtures at 20, 50, and 80 wt% water.

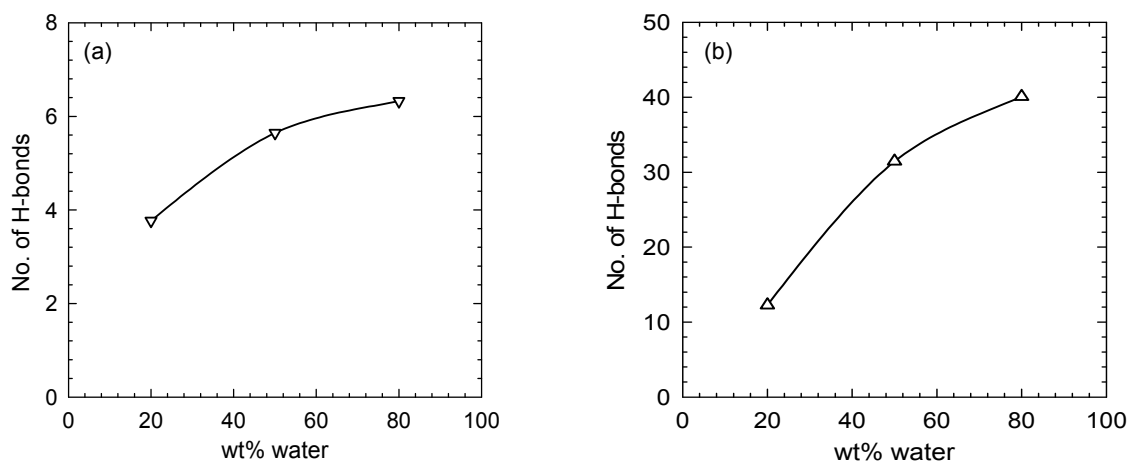

**Fig. S3** Numbers of H-bonds between (a) [Ac]<sup>-</sup>-water per [Ac]<sup>-</sup> (b) cellulose-water per cellulose in cellulose/[BMIM][Ac]/water mixtures at 20, 50, and 80 wt% water.
